# Supplementary material for: Variation in Troponin I Measurement and the Cardiovascular Management Approach Following Elevated Troponin I Among Critically Ill Patients With Sepsis
Source: PubMed Central journal article supplement — Crit Care Explor. 2023 Jan 10;5(1):e0842. doi: 10.1097/CCE.0000000000000842 (PMC9833455; doi:10.1097/cce.0000000000000842), 2023-01-10
Supplement: cc9-5-e0842-s001.pdf [file cc9-5-e0842-s001.pdf]

**e-Table 1: Definitions of Cardiovascular Diagnostics and Therapeutics**

| <b>Cardiovascular Diagnostics</b>  | <b>Testing</b>                                                                                                                                | <b>Description</b>                                                                                                                                                                                                                                                                                                                                                                                                                                 |
|------------------------------------|-----------------------------------------------------------------------------------------------------------------------------------------------|----------------------------------------------------------------------------------------------------------------------------------------------------------------------------------------------------------------------------------------------------------------------------------------------------------------------------------------------------------------------------------------------------------------------------------------------------|
| Serial troponin I                  | Troponin I                                                                                                                                    | <ul style="list-style-type: none"> <li>At least one additional troponin I measured within 7 days of the first elevated troponin I measurement</li> </ul>                                                                                                                                                                                                                                                                                           |
| Trend troponin I to peak           | Troponin I                                                                                                                                    | <ul style="list-style-type: none"> <li>At least one additional troponin I measured within 7 days of the maximum elevated troponin I measurement</li> </ul>                                                                                                                                                                                                                                                                                         |
| Echocardiography                   | Transthoracic echocardiography, Transesophageal echocardiography                                                                              | <ul style="list-style-type: none"> <li>Performed within 7 days of the first elevated troponin I measurement</li> </ul>                                                                                                                                                                                                                                                                                                                             |
| Cardiac stress test                | Electrocardiogram stress test, Echocardiogram stress test (exercise/pharmacological), Nuclear medicine stress test (exercise/pharmacological) | <ul style="list-style-type: none"> <li>Performed within 7 days of the first elevated troponin I measurement</li> </ul>                                                                                                                                                                                                                                                                                                                             |
| Cardiac Catheterization            | Right heart catheterization, Left heart catheterization                                                                                       | <ul style="list-style-type: none"> <li>Performed within 7 days of the first elevated troponin I measurement</li> </ul>                                                                                                                                                                                                                                                                                                                             |
| <b>Cardiovascular Therapeutics</b> | <b>Medications</b>                                                                                                                            | <b>Description</b>                                                                                                                                                                                                                                                                                                                                                                                                                                 |
| Antiplatelet agents                | Abciximab, Aspirin, Clopidogrel, Eptifibatide, Prasugrel, Ticagrelor, Ticlopidine, Tirofiban                                                  | <ul style="list-style-type: none"> <li>Receipt within 7 days of the first elevated troponin I measurement</li> </ul>                                                                                                                                                                                                                                                                                                                               |
| Therapeutic anticoagulation        | Bivalrudin, Dalteparin, Enoxaparin, Fondaparinux, Heparin drip                                                                                | <ul style="list-style-type: none"> <li>Receipt within 1 day of the first elevated troponin I measurement</li> <li>Anticoagulant medications doses greater than venous thromboembolism prophylactic doses were as follows: intravenous heparin dose &gt;20,000 units daily, subcutaneous enoxaparin twice daily dosing (with daily dose greater than 80mg), subcutaneous dalteparin &gt;5000 IU daily, and fondaparinux &gt;2.5mg daily.</li> </ul> |
| Beta-blockers                      | Carvedilol, Esmolol, Metoprolol                                                                                                               | <ul style="list-style-type: none"> <li>Receipt within 7 days of the first elevated troponin I measurement</li> </ul>                                                                                                                                                                                                                                                                                                                               |
| Statins                            | Atorvastatin, Cerivastatin, Fluvastatin, Lovastatin, Pitavastatin, Pravastatin, Rosuvastatin, Simvastatin                                     | <ul style="list-style-type: none"> <li>Receipt within 7 days of the first elevated troponin I measurement</li> </ul>                                                                                                                                                                                                                                                                                                                               |

<sup>a</sup>Abbreviations: IU=International units; mg=milligrams

**e-Table 2: Definitions of Cardiovascular Disease History and Cardiovascular Disease Equivalents**

| <b>Cardiovascular Disease Subgroups</b>                       | <b>Medical Comorbidity</b>    | <b><i>International Classification of Diseases<br/>10<sup>th</sup> Revision (ICD-10)</i></b> |
|---------------------------------------------------------------|-------------------------------|----------------------------------------------------------------------------------------------|
| Cardiovascular Disease                                        | Myocardial Infarction         | I21.x, I22.x, I25.2                                                                          |
|                                                               | Congestive Heart Failure      | I09.9, I11.0, I13.0, I13.2, I25.5, I42.0, I42.5-I42.9, I43.x, I50.x, P29.0                   |
|                                                               | Cardiac Arrhythmia            | I44.1-I44.3, I45.6, I45.9, I47.x-I49.x, ROO.O, ROO.1, ROO.8, T82.1, Z45.0, Z95.0             |
|                                                               | Peripheral Vascular Disease   | I70.x, I71.x, I73.1, I73.8, I73.9, I77.1, I79.0, I79.2, K55.1, K55.8, K55.9, Z95.8, Z95.9    |
|                                                               | Cerebrovascular Disease       | G45.x, G46.x, H34.0, I60.x-I69.x                                                             |
|                                                               | Pulmonary Circulation Disease | I26.x, I27.x, I28.0, I28.8, I28.9                                                            |
| Cardiovascular Disease and Cardiovascular Disease Equivalents | Cardiovascular Disease        | Defined above                                                                                |
|                                                               | Diabetes Mellitus             | E10.0-E10.9, E11.0, E11.1, E11.9, E12.0-E12.9, E13.0-E13.9, E14.0-E14.9                      |
|                                                               | Chronic Kidney Disease        | I12.0, I13.1, N18.x, N19.x, N25.0, Z49.0-Z49.2, Z94.0, Z199.2                                |

<sup>a</sup>Comorbidities identified as present on admission

**e-Table 3: Baseline characteristics of critically ill adults with sepsis and elevated troponin I stratified by cardiovascular disease history**

| Characteristics                       | Sepsis and Elevated Troponin I Cohort | Cardiovascular Disease | No Prior Cardiovascular Disease | Cardiovascular Disease or Cardiovascular Disease Equivalents | No Prior Cardiovascular Disease or Cardiovascular Disease Equivalents |
|---------------------------------------|---------------------------------------|------------------------|---------------------------------|--------------------------------------------------------------|-----------------------------------------------------------------------|
| Total N (%)                           | 27,665 (100)                          | 21,974 (79.4)          | 5,691 (20.6)                    | 24,816 (89.7)                                                | 2,849 (10.3)                                                          |
| <b>Admission Year, n (%)</b>          |                                       |                        |                                 |                                                              |                                                                       |
| 2016                                  | 2,620 (9.5)                           | 2,001 (9.1)            | 619 (10.9)                      | 2,313 (9.3)                                                  | 307 (10.8)                                                            |
| 2017                                  | 5,636 (20.4)                          | 4,429 (20.2)           | 1,207 (21.2)                    | 5,021 (20.2)                                                 | 615 (21.6)                                                            |
| 2018                                  | 7,100 (25.7)                          | 5,645 (25.7)           | 1,455 (25.6)                    | 6,360 (25.6)                                                 | 740 (26.0)                                                            |
| 2019                                  | 7,982 (28.9)                          | 6,439 (29.3)           | 1,543 (27.1)                    | 7,240 (29.2)                                                 | 742 (26.0)                                                            |
| 2020                                  | 4,327 (15.6)                          | 3,460 (15.7)           | 867 (15.2)                      | 3,882 (15.6)                                                 | 445 (15.6)                                                            |
| <b>PATIENT-LEVEL CHARACTERISTICS</b>  |                                       |                        |                                 |                                                              |                                                                       |
| <b>Age (years), median (IQR)</b>      | 69 (59, 78)                           | 70 (61, 79)            | 63 (53, 73)                     | 70 (60, 79)                                                  | 61 (49, 71)                                                           |
| <b>Sex (Female), n (%)</b>            | 12,530 (45.3)                         | 9,851 (44.8)           | 2,679 (47.1)                    | 11,212 (45.2)                                                | 1,318 (46.3)                                                          |
| <b>Race, n (%)</b>                    |                                       |                        |                                 |                                                              |                                                                       |
| White                                 | 21,852 (79.0)                         | 17,385 (79.1)          | 4,467 (78.5)                    | 19,503 (78.6)                                                | 2,349 (82.5)                                                          |
| Black                                 | 4,017 (14.5)                          | 3,187 (14.5)           | 830 (14.6)                      | 3,708 (14.9)                                                 | 309 (10.8)                                                            |
| Other                                 | 1,796 (6.5)                           | 1,402 (6.4)            | 394 (6.9)                       | 1,605 (6.5)                                                  | 191 (6.7)                                                             |
| <b>Ethnicity (Hispanic), n (%)</b>    | 1,571 (5.7)                           | 1,169 (5.3)            | 402 (7.1)                       | 1,426 (5.7)                                                  | 145 (5.1)                                                             |
| <b>Medical Comorbidities, n (%)</b>   |                                       |                        |                                 |                                                              |                                                                       |
| Myocardial Infarction                 | 7,104 (25.7)                          | 7,104 (32.3)           | 0 (0.0)                         | 7,104 (28.6)                                                 | 0 (0.0)                                                               |
| Congestive Heart Failure              | 14,594 (52.8)                         | 14,594 (66.4)          | 0 (0.0)                         | 14,594 (58.8)                                                | 0 (0.0)                                                               |
| Cardiac Arrhythmia                    | 12,080 (43.7)                         | 12,080 (55.0)          | 0 (0.0)                         | 12,080 (48.7)                                                | 0 (0.0)                                                               |
| Peripheral Vascular Disease           | 2,971 (10.7)                          | 2,971 (13.5)           | 0 (0.0)                         | 2,971 (12.0)                                                 | 0 (0.0)                                                               |
| Cerebrovascular Disease               | 1,840 (6.7)                           | 1,840 (8.4)            | 0 (0.0)                         | 1,840 (7.4)                                                  | 0 (0.0)                                                               |
| Pulmonary Circulation Disease         | 4,318 (15.6)                          | 4,318 (19.7)           | 0 (0.0)                         | 4,318 (17.4)                                                 | 0 (0.0)                                                               |
| Diabetes Mellitus                     | 12,815 (46.3)                         | 10,599 (48.2)          | 2,216 (38.9)                    | 12,815 (51.6)                                                | 0 (0.0)                                                               |
| Chronic Kidney Disease                | 11,445 (41.4)                         | 9,909 (45.1)           | 1,536 (27.0)                    | 11,445 (46.1)                                                | 0 (0.0)                                                               |
| Hypertension                          | 21,743 (78.6)                         | 18,020 (82.0)          | 3,723 (65.4)                    | 20,327 (81.9)                                                | 1,416 (49.7)                                                          |
| Chronic Pulmonary Disease             | 11,449 (41.4)                         | 9,667 (44.0)           | 1,782 (31.3)                    | 10,527 (42.4)                                                | 922 (32.4)                                                            |
| Liver Disease                         | 4,505 (16.3)                          | 3,429 (15.6)           | 1,076 (18.9)                    | 3,892 (15.7)                                                 | 613 (21.5)                                                            |
| <b>Organ Support Therapies, n (%)</b> |                                       |                        |                                 |                                                              |                                                                       |
| Vasopressors                          | 12,010 (43.4)                         | 9,384 (42.7)           | 2,626 (46.1)                    | 10,601 (42.7)                                                | 1,409 (49.5)                                                          |
| Invasive Mechanical Ventilation       | 12,802 (46.3)                         | 10,144 (46.2)          | 2,658 (46.7)                    | 11,316 (45.6)                                                | 1,486 (52.2)                                                          |
| Hospital Dialysis                     | 1,572 (5.7)                           | 1,272 (5.8)            | 300 (5.3)                       | 1,501 (6.0)                                                  | 71 (2.5)                                                              |

|                                                   |               |               |              |               |              |
|---------------------------------------------------|---------------|---------------|--------------|---------------|--------------|
| <b>Maximum Admission SOFA Score, median (IQR)</b> | 4 (2, 6)      | 4 (2, 6)      | 4 (2, 6)     | 4 (2, 6)      | 4 (2, 6)     |
| <b>FACILITY-LEVEL CHARACTERISTICS</b>             |               |               |              |               |              |
| <b>Hospital Community Type, n (%)</b>             |               |               |              |               |              |
| Rural                                             | 3,321 (12.0)  | 2,724 (12.4)  | 597 (10.5)   | 3,062 (12.3)  | 259 (9.1)    |
| Urban                                             | 24,344 (88.0) | 19,250 (87.6) | 5,094 (89.5) | 21,754 (87.7) | 2,590 (90.9) |
| <b>Teaching Status, n (%)</b>                     |               |               |              |               |              |
| Community Hospital                                | 14,058 (50.8) | 11,053 (50.3) | 3,005 (52.8) | 12,556 (50.6) | 1,502 (52.7) |
| Academic Hospital                                 | 13,607 (49.2) | 10,921 (49.7) | 2,686 (47.2) | 12,260 (49.4) | 1,347 (47.3) |
| <b>Hospital Beds, n (%)</b>                       |               |               |              |               |              |
| ≥ 500                                             | 9,557 (34.5)  | 7,695 (35.0)  | 1,862 (32.7) | 8,680 (35.0)  | 598 (21.0)   |
| 200-499                                           | 12,383 (44.8) | 9,724 (44.3)  | 2,659 (46.7) | 11,009 (44.4) | 1,374 (48.2) |
| < 200                                             | 5,725 (20.7)  | 4,555 (20.7)  | 1,170 (20.6) | 5,127 (20.7)  | 877 (30.8)   |
| <b>Geographic Region, n (%)</b>                   |               |               |              |               |              |
| South                                             | 17,783 (64.3) | 13,965 (63.6) | 3,818 (67.1) | 15,888 (64.0) | 1,895 (66.5) |
| Northeast                                         | 2,168 (7.8)   | 1,718 (7.8)   | 450 (7.9)    | 1,926 (7.8)   | 242 (8.5)    |
| Midwest                                           | 7,633 (27.6)  | 6,222 (28.3)  | 1,411 (24.8) | 6,927 (27.9)  | 706 (24.8)   |
| West                                              | 81 (0.3)      | 69 (0.3)      | 12 (0.2)     | 75 (0.3)      | 6 (0.2)      |

<sup>a</sup>Abbreviations: IQR=Interquartile range; SOFA=Sequential organ failure assessment

**e-Table 4: Cohort characteristics of critically ill adults with sepsis and elevated troponin I stratified by receipt of cardiovascular diagnostic testing**

| Characteristics                                      | Cardiovascular Diagnostic Testing |                          |                   |                     |                         |
|------------------------------------------------------|-----------------------------------|--------------------------|-------------------|---------------------|-------------------------|
|                                                      | Serial Troponin I                 | Trend Troponin I to Peak | Echocardiography  | Cardiac Stress Test | Cardiac Catheterization |
| <b>Total N (%)</b>                                   | 23,447 (84.8)                     | 18,255 (66.0)            | 18,455 (66.7)     | 1,128 (4.1)         | 1,829 (6.6)             |
| <b>First Elevated Troponin I Level, median (IQR)</b> | 0.16 (0.07, 0.54)                 | 0.18 (0.08, 0.62)        | 0.18 (0.08, 0.65) | 0.24 (0.10, 0.93)   | 0.49 (0.13, 2.54)       |
| <b>Maximum Troponin I Level, median (IQR)</b>        | 0.37 (0.12, 1.71)                 | 0.38 (0.12, 1.77)        | 0.44 (0.13, 2.14) | 0.72 (0.19, 2.86)   | 3.36 (0.62, 12.80)      |
| <b>Admission Year, n (%)</b>                         |                                   |                          |                   |                     |                         |
| 2016                                                 | 2,191 (9.3)                       | 1,633 (8.9)              | 1,797 (9.7)       | 131 (11.6)          | 175 (9.6)               |
| 2017                                                 | 4,704 (20.1)                      | 3,726 (20.4)             | 3,625 (19.6)      | 248 (22.0)          | 358 (19.6)              |
| 2018                                                 | 6,007 (25.6)                      | 4,628 (25.4)             | 4,758 (25.8)      | 293 (26.0)          | 516 (28.2)              |
| 2019                                                 | 6,836 (29.2)                      | 5,369 (29.4)             | 5,428 (29.4)      | 310 (27.5)          | 536 (29.3)              |
| 2020                                                 | 3,709 (15.8)                      | 2,899 (15.9)             | 2,847 (15.4)      | 146 (12.9)          | 244 (13.3)              |
| <b>PATIENT-LEVEL CHARACTERISTICS</b>                 |                                   |                          |                   |                     |                         |
| <b>Age (years), median (IQR)</b>                     | 69 (59, 78)                       | 69 (59, 78)              | 69 (59, 78)       | 67 (58, 76)         | 67 (59, 75)             |
| <b>Sex (Female), n (%)</b>                           | 10,606 (45.2)                     | 8,382 (45.9)             | 8,264 (44.8)      | 514 (45.6)          | 770 (42.1)              |
| <b>Race, n (%)</b>                                   |                                   |                          |                   |                     |                         |
| White                                                | 18,500 (78.9)                     | 14,439 (79.1)            | 14,590 (79.1)     | 750 (66.5)          | 1,482 (81.0)            |
| Black                                                | 3,426 (14.6)                      | 2,613 (14.3)             | 2,749 (14.9)      | 180 (16.0)          | 199 (10.9)              |
| Other                                                | 1,521 (6.5)                       | 1,203 (6.6)              | 1,116 (6.0)       | 198 (17.6)          | 148 (8.1)               |
| <b>Ethnicity (Hispanic), n (%)</b>                   | 1,299 (5.5)                       | 987 (5.4)                | 1,064 (5.8)       | 59 (5.2)            | 100 (5.5)               |
| <b>Medical Comorbidities, n (%)</b>                  |                                   |                          |                   |                     |                         |
| Myocardial Infarction                                | 6,795 (29.0)                      | 5,463 (29.9)             | 5,787 (31.4)      | 422 (37.4)          | 1,202 (65.7)            |
| Congestive Heart Failure                             | 12,638 (53.9)                     | 9,774 (53.5)             | 10,351 (56.1)     | 663 (58.8)          | 1,366 (74.7)            |
| Cardiac Arrhythmia                                   | 10,256 (43.7)                     | 7,887 (43.2)             | 8,321 (45.1)      | 447 (39.6)          | 869 (47.5)              |
| Peripheral Vascular Disease                          | 2,567 (10.9)                      | 1,963 (10.8)             | 1,977 (10.7)      | 128 (11.3)          | 237 (13.0)              |
| Cerebrovascular Disease                              | 1,601 (6.8)                       | 1,241 (6.8)              | 1,386 (7.5)       | 83 (7.4)            | 109 (6.0)               |
| Pulmonary Circulation Disease                        | 3,759 (16.0)                      | 2,909 (15.9)             | 3,218 (17.4)      | 182 (16.1)          | 288 (15.7)              |
| Diabetes Mellitus                                    | 10,877 (46.4)                     | 8,299 (45.5)             | 8,450 (45.8)      | 555 (49.2)          | 939 (51.3)              |
| Chronic Kidney Disease                               | 9,685 (41.3)                      | 7,307 (40.0)             | 7,568 (41.0)      | 485 (43.0)          | 685 (37.5)              |

|                                                   |               |               |               |              |              |
|---------------------------------------------------|---------------|---------------|---------------|--------------|--------------|
| Hypertension                                      | 18,458 (78.7) | 14,297 (78.3) | 14,380 (77.9) | 904 (80.1)   | 1,500 (82.0) |
| Chronic Pulmonary Disease                         | 9,772 (41.7)  | 7,739 (42.4)  | 7,453 (40.4)  | 442 (39.2)   | 730 (39.9)   |
| Liver Disease                                     | 3,831 (16.3)  | 2,895 (15.9)  | 3,106 (16.8)  | 182 (16.1)   | 242 (13.2)   |
| <b>Organ Support Therapies, n (%)</b>             |               |               |               |              |              |
| Vasopressors                                      | 10,030 (42.8) | 7,642 (41.9)  | 8,080 (43.8)  | 405 (35.9)   | 751 (41.1)   |
| Invasive Mechanical Ventilation                   | 10,956 (46.7) | 8,536 (46.8)  | 8,823 (47.8)  | 434 (38.5)   | 945 (51.7)   |
| Dialysis                                          | 1,253 (5.3)   | 880 (4.8)     | 957 (5.2)     | 81 (7.2)     | 87 (4.8)     |
| <b>Maximum Admission SOFA Score, median (IQR)</b> | 4 (2, 6)      | 4 (2, 6)      | 4 (2, 6)      | 3 (2, 5)     | 4 (2, 6)     |
| <b>FACILITY-LEVEL CHARACTERISTICS</b>             |               |               |               |              |              |
| <b>Hospital Community Type, n (%)</b>             |               |               |               |              |              |
| Rural                                             | 2,798 (11.9)  | 2,153 (11.8)  | 2,199 (11.9)  | 70 (6.2)     | 218 (11.9)   |
| Urban                                             | 20,649 (88.1) | 16,102 (88.2) | 16,256 (88.1) | 1,058 (93.8) | 1,611 (88.1) |
| <b>Teaching Status, n (%)</b>                     |               |               |               |              |              |
| Community Hospital                                | 11,788 (50.3) | 8,756 (47.9)  | 9,700 (52.6)  | 477 (42.3)   | 846 (46.3)   |
| Academic Hospital                                 | 11,659 (49.7) | 9,509 (52.1)  | 8,755 (47.4)  | 651 (57.7)   | 983 (53.7)   |
| <b>Hospital Beds, n (%)</b>                       |               |               |               |              |              |
| ≥ 500                                             | 8,133 (34.7)  | 6,485 (35.5)  | 6,713 (36.4)  | 426 (37.8)   | 690 (37.7)   |
| 200-499                                           | 10,326 (44.0) | 7,832 (42.9)  | 7,820 (42.4)  | 541 (48.0)   | 864 (47.2)   |
| < 200                                             | 4,988 (21.3)  | 3,938 (21.6)  | 3,922 (21.3)  | 161 (14.3)   | 275 (15.0)   |
| <b>Geographic Region, n (%)</b>                   |               |               |               |              |              |
| South                                             | 14,915 (63.6) | 11,032 (60.4) | 11,450 (62.0) | 597 (52.9)   | 1,193 (65.2) |
| Northeast                                         | 1,932 (8.2)   | 1,743 (9.5)   | 1,634 (8.9)   | 83 (7.4)     | 192 (10.5)   |
| Midwest                                           | 6,530 (27.9)  | 5,422 (29.7)  | 5,320 (28.8)  | 448 (39.7)   | 439 (24.0)   |
| West                                              | 70 (0.3)      | 58 (0.3)      | 51 (0.3)      | 0 (0.0)      | 5 (0.3)      |

<sup>a</sup>Abbreviations: IQR=Interquartile range; SOFA=Sequential organ failure assessment

**e-Table 5: Cohort characteristics of critically ill adults with sepsis and elevated troponin I stratified by receipt of cardiovascular therapeutics**

| Characteristics                                      | Cardiovascular Therapeutics |                             |                   |                   |
|------------------------------------------------------|-----------------------------|-----------------------------|-------------------|-------------------|
|                                                      | Antiplatelet Agents         | Therapeutic Anticoagulation | Beta-Blockers     | Statins           |
| <b>Total N (%)</b>                                   | 13,349 (48.3)               | 2,293 (8.3)                 | 13,967 (50.5)     | 10,541 (38.1)     |
| <b>First Elevated Troponin I Level, median (IQR)</b> | 0.19 (0.08, 0.76)           | 0.33 (0.09, 1.66)           | 0.16 (0.07, 0.58) | 0.17 (0.07, 0.68) |
| <b>Maximum Troponin I Level, median (IQR)</b>        | 0.50 (0.13, 2.73)           | 1.20 (0.21, 6.40)           | 0.36 (0.11, 1.93) | 0.41 (0.11, 2.42) |
| <b>Admission Year, n (%)</b>                         |                             |                             |                   |                   |
| 2016                                                 | 1,332 (10.0)                | 146 (6.4)                   | 1,306 (9.4)       | 963 (9.1)         |
| 2017                                                 | 2,807 (21.0)                | 466 (20.3)                  | 2,894 (20.7)      | 2,101 (19.9)      |
| 2018                                                 | 3,545 (26.6)                | 648 (28.3)                  | 3,675 (26.3)      | 2,750 (26.1)      |
| 2019                                                 | 3,750 (28.1)                | 672 (29.3)                  | 4,006 (28.7)      | 3,096 (29.4)      |
| 2020                                                 | 1,915 (14.3)                | 362 (15.8)                  | 2,086 (14.9)      | 1,631 (15.5)      |
| <b>PATIENT-LEVEL CHARACTERISTICS</b>                 |                             |                             |                   |                   |
| <b>Age (years), median (IQR)</b>                     | 70 (61, 79)                 | 68 (59, 76)                 | 70 (61, 79)       | 71 (63, 79)       |
| <b>Sex (Female), n (%)</b>                           | 5,882 (44.1)                | 995 (43.4)                  | 6,234 (44.6)      | 4,623 (43.9)      |
| <b>Race, n (%)</b>                                   |                             |                             |                   |                   |
| White                                                | 10,794 (80.9)               | 1,788 (78.0)                | 11,121 (79.6)     | 8,421 (79.9)      |
| Black                                                | 1,829 (13.7)                | 279 (12.2)                  | 1,993 (14.3)      | 1,439 (13.7)      |
| Other                                                | 726 (5.4)                   | 226 (9.9)                   | 853 (6.1)         | 681 (6.5)         |
| <b>Ethnicity (Hispanic), n (%)</b>                   | 682 (5.1)                   | 44 (1.9)                    | 711 (5.1)         | 513 (4.9)         |
| <b>Medical Comorbidities, n (%)</b>                  |                             |                             |                   |                   |
| Myocardial Infarction                                | 4,974 (37.3)                | 1,144 (49.9)                | 4,526 (32.4)      | 3,875 (36.8)      |
| Congestive Heart Failure                             | 8,390 (62.9)                | 1,397 (60.9)                | 8,837 (63.3)      | 6,762 (64.1)      |
| Cardiac Arrhythmia                                   | 6,083 (45.6)                | 1,019 (44.4)                | 7,010 (50.2)      | 4,914 (46.6)      |
| Peripheral Vascular Disease                          | 1,641 (12.3)                | 264 (11.5)                  | 1,677 (12.0)      | 1,396 (13.2)      |
| Cerebrovascular Disease                              | 1,034 (7.7)                 | 149 (6.5)                   | 1,047 (7.5)       | 924 (8.8)         |
| Pulmonary Circulation Disease                        | 2,215 (16.6)                | 457 (19.9)                  | 2,223 (15.9)      | 1,752 (16.6)      |
| Diabetes Mellitus                                    | 6,964 (52.2)                | 1,130 (49.3)                | 7,017 (50.2)      | 5,985 (56.8)      |
| Chronic Kidney Disease                               | 6,103 (45.7)                | 892 (38.9)                  | 6,321 (45.3)      | 5,135 (48.7)      |

|                                                   |               |              |               |              |
|---------------------------------------------------|---------------|--------------|---------------|--------------|
| Hypertension                                      | 11,195 (83.9) | 1,852 (80.8) | 11,933 (85.4) | 9,164 (86.9) |
| Chronic Pulmonary Disease                         | 5,960 (44.6)  | 995 (43.4)   | 6,108 (43.7)  | 4,790 (45.4) |
| Liver Disease                                     | 1,678 (12.6)  | 329 (14.3)   | 1,904 (13.6)  | 987 (9.4)    |
| <b>Organ Support Therapies, n (%)</b>             |               |              |               |              |
| Vasopressors                                      | 5,087 (38.1)  | 957 (41.7)   | 4,901 (35.1)  | 3,861 (36.6) |
| Invasive Mechanical Ventilation                   | 5,636 (42.2)  | 1,099 (47.9) | 6,156 (44.1)  | 4,340 (41.2) |
| Dialysis                                          | 633 (4.7)     | 108 (4.7)    | 697 (5.0)     | 495 (4.7)    |
| <b>Maximum Admission SOFA Score, median (IQR)</b> | 4 (2, 5)      | 4 (2, 5)     | 4 (2, 5)      | 4 (2, 5)     |
| <b>Hospital Mortality, n (%)</b>                  | 1,810 (13.6)  | 419 (18.3)   | 1,847 (13.2)  | 1,286 (12.2) |
| <b>FACILITY-LEVEL CHARACTERISTICS</b>             |               |              |               |              |
| <b>Hospital Community Type, n (%)</b>             |               |              |               |              |
| Rural                                             | 1,746 (13.1)  | 191 (8.3)    | 1,834 (13.1)  | 1,358 (12.9) |
| Urban                                             | 11,603 (86.9) | 2,102 (91.7) | 12,133 (86.9) | 9,183 (87.1) |
| <b>Teaching Status, n (%)</b>                     |               |              |               |              |
| Community Hospital                                | 6,989 (52.4)  | 1,024 (44.7) | 7,213 (51.6)  | 5,225 (49.6) |
| Academic Hospital                                 | 6,360 (47.6)  | 1,269 (55.3) | 6,754 (48.4)  | 5,316 (50.4) |
| <b>Hospital Beds, n (%)</b>                       |               |              |               |              |
| ≥ 500                                             | 4,381 (32.8)  | 463 (20.2)   | 4,651 (33.3)  | 3,441 (32.6) |
| 200-499                                           | 5,857 (43.9)  | 1,342 (58.5) | 6,260 (44.8)  | 4,763 (45.2) |
| < 200                                             | 3,111 (23.3)  | 488 (21.3)   | 3,056 (21.9)  | 2,337 (22.2) |
| <b>Geographic Region, n (%)</b>                   |               |              |               |              |
| South                                             | 8,559 (64.1)  | 1,559 (68.0) | 9,064 (64.9)  | 6,507 (61.7) |
| Northeast                                         | 1,037 (7.8)   | 8 (0.3)      | 1,055 (7.6)   | 879 (8.3)    |
| Midwest                                           | 3,722 (27.9)  | 726 (31.7)   | 3,815 (27.3)  | 3,128 (29.7) |
| West                                              | 31 (0.2)      | 0 (0.0)      | 33 (0.2)      | 27 (0.3)     |

<sup>a</sup>Abbreviations: IQR=Interquartile range; SOFA=Sequential organ failure assessment



**e-Table 6: Multivariable adjusted odds of troponin I measurement among critically ill adults with sepsis**

| <b>Characteristics</b>               | <b>Total Sepsis Cohort<br/>(N=27665)<br/>OR (95% CI)</b> |
|--------------------------------------|----------------------------------------------------------|
| <b>Admission Year</b>                |                                                          |
| 2016                                 | 1.00 (reference)                                         |
| 2017                                 | 1.00 (0.93, 1.07)                                        |
| 2018                                 | 1.08 (1.01, 1.16)                                        |
| 2019                                 | 1.02 (0.95, 1.10)                                        |
| 2020                                 | 0.88 (0.81, 0.95)                                        |
| <b>PATIENT-LEVEL CHARACTERISTICS</b> |                                                          |
| <b>Age</b>                           | 1.28 (1.25, 1.30)<br>per 1 year increase                 |
| <b>Sex (Female)</b>                  | 0.99 (0.95, 1.02)                                        |
| <b>Race</b>                          |                                                          |
| White                                | 1.00 (reference)                                         |
| Black                                | 1.32 (1.24, 1.41)                                        |
| Other                                | 1.09 (1.00, 1.18)                                        |
| <b>Ethnicity (Hispanic)</b>          | 0.95 (0.87, 1.03)                                        |
| <b>Comorbidities</b>                 |                                                          |
| Myocardial Infarction                | 5.21 (4.72, 5.74)                                        |
| Congestive Heart Failure             | 1.54 (1.47, 1.61)                                        |
| Cardiac Arrhythmia                   | 1.28 (1.22, 1.33)                                        |
| Peripheral Vascular Disease          | 0.98 (0.91, 1.05)                                        |
| Cerebrovascular Disease              | 1.23 (1.12, 1.35)                                        |
| Pulmonary Circulation Disease        | 1.34 (1.25, 1.42)                                        |
| Diabetes Mellitus                    | 1.04 (1.00, 1.08)                                        |
| Chronic Kidney Disease               | 0.91 (0.86, 0.95)                                        |
| Hypertension                         | 1.10 (1.05, 1.15)                                        |
| Chronic Pulmonary Disease            | 1.36 (1.31, 1.42)                                        |
| Liver Disease                        | 0.93 (0.89, 0.98)                                        |
| <b>Organ Support Therapies</b>       |                                                          |
| Vasopressors                         | 0.89 (0.85, 0.93)                                        |
| Invasive Mechanical Ventilation      | 1.46 (1.40, 1.52)                                        |
| Dialysis                             | 1.06 (0.95, 1.19)                                        |

|                                       |                                          |
|---------------------------------------|------------------------------------------|
| <b>Maximum Admission SOFA Score</b>   | 1.20 (1.17, 1.23)<br>per 1 unit increase |
| <b>FACILITY-LEVEL CHARACTERISTICS</b> |                                          |
| <b>Hospital Community Type</b>        |                                          |
| Rural                                 | 1.00 (reference)                         |
| Urban                                 | 4.45 (1.72, 11.51)                       |
| <b>Teaching Status</b>                |                                          |
| Community Hospital                    | 1.00 (reference)                         |
| Academic Hospital                     | 2.16 (0.85, 5.50)                        |
| <b>Hospital Beds</b>                  |                                          |
| ≥ 500                                 | 1.00 (reference)                         |
| 200-499                               | 4.86 (1.53, 15.41)                       |
| < 200                                 | 8.99 (2.55, 33.66)                       |
| <b>Geographic Region</b>              |                                          |
| South                                 | 1.00 (reference)                         |
| Northeast                             | 0.13 (0.04, 0.44)                        |
| Midwest                               | 1.55 (0.63, 3.80)                        |
| West                                  | 0.06 (0.01, 0.48)                        |

<sup>a</sup>Abbreviations: OR = Odds ratio; CI = Confidence interval; SOFA = Sequential organ failure assessment

<sup>b</sup>Covariates:

**Patient-level factors** such as age, sex, race, ethnicity; history of myocardial infarction, congestive heart failure, cardiac arrhythmia, peripheral vascular disease, cerebrovascular disease, pulmonary circulation disease, diabetes mellitus, chronic kidney disease, hypertension, chronic pulmonary disease, liver disease; admission year, organ support therapies received, and maximum admission sequential organ failure assessment score.

**Facility-level factors** such as hospital community type, hospital teaching status, hospital beds, and hospital geographic region.

**e-Table 7: Cardiovascular diagnostics and therapeutics among critically ill adults with sepsis stratified by troponin I elevation**

| <b>Cardiovascular Management Approach</b> | <b>Elevated Troponin I</b> | <b>Normal Troponin I</b> | <b>P Value</b> |
|-------------------------------------------|----------------------------|--------------------------|----------------|
| Total N (%)                               | 27,968 (52.7)              | 25,090 (47.3)            | -              |
| <b>CARDIOVASCULAR DIAGNOSTIC TESTING</b>  |                            |                          |                |
| <b>Serial troponin I, n (%)</b>           | 23,657 (84.6)              | 8,743 (34.8)             | < 0.01         |
| <b>Trend troponin I to peak, n (%)</b>    | 18,421 (65.9)              | 5,459 (21.8)             | < 0.01         |
| <b>Echocardiography, n (%)</b>            | 20,028 (71.6)              | 11,523 (45.9)            | < 0.01         |
| <b>Cardiac stress test, n (%)</b>         | 1,325 (4.7)                | 474 (1.9)                | < 0.01         |
| <b>Cardiac catheterization, n (%)</b>     | 2,183 (7.8)                | 192 (0.8)                | < 0.01         |
| <b>CARDIOVASCULAR THERAPEUTICS</b>        |                            |                          |                |
| <b>Antiplatelet agents, n (%)</b>         | 14,665 (52.4)              | 7,518 (30.0)             | < 0.01         |
| <b>Therapeutic anticoagulation, n (%)</b> | 3,478 (12.4)               | 1,322 (5.3)              | < 0.01         |
| <b>Beta-blockers, n (%)</b>               | 15,951 (57.0)              | 10,293 (41.0)            | < 0.01         |
| <b>Statins, n (%)</b>                     | 11,821 (42.3)              | 7,975 (31.8)             | < 0.01         |

**e-Table 8: Cardiovascular diagnostics and therapeutics among critically ill adults with sepsis and elevated troponin I stratified by cardiovascular disease history**

| <b>Cardiovascular Management Approach</b>                                                  | <b>Sepsis and Elevated Troponin I Cohort</b> | <b>Cardiovascular Disease</b> | <b>No Prior Cardiovascular Disease</b> | <b>Cardiovascular Disease or Cardiovascular Disease Equivalents</b> | <b>No Prior Cardiovascular Disease or Cardiovascular Disease Equivalents</b> |
|--------------------------------------------------------------------------------------------|----------------------------------------------|-------------------------------|----------------------------------------|---------------------------------------------------------------------|------------------------------------------------------------------------------|
| Total N (%)                                                                                | 27,665 (100)                                 | 21,974 (79.4)                 | 5,691 (20.6)                           | 24,816 (89.7)                                                       | 2,849 (10.3)                                                                 |
| <b>CARDIOVASCULAR DIAGNOSTIC TESTING</b>                                                   |                                              |                               |                                        |                                                                     |                                                                              |
| Hospital day of first elevated troponin I, median (IQR)                                    | 1 (1, 1)                                     | 1 (1, 1)                      | 1 (1, 1)                               | 1 (1, 1)                                                            | 1 (1, 1)                                                                     |
| First elevated troponin I level (ng/mL), median (IQR)                                      | 0.14 (0.07, 0.47)                            | 0.16 (0.07, 0.56)             | 0.10 (0.06, 0.27)                      | 0.15 (0.07, 0.50)                                                   | 0.11 (0.06, 0.31)                                                            |
| Hospital day of maximum troponin I level, median (IQR)                                     | 1 (1, 2)                                     | 1 (1, 2)                      | 1 (1, 2)                               | 1 (1, 2)                                                            | 1 (1, 2)                                                                     |
| Maximum troponin I level (ng/mL), median (IQR)                                             | 0.28 (0.09, 1.30)                            | 0.34 (0.10, 1.74)             | 0.16 (0.07, 0.51)                      | 0.30 (0.10, 1.47)                                                   | 0.18 (0.08, 0.54)                                                            |
| <b>Serial troponin I, n (%)</b>                                                            | 23,447 (84.8)                                | 19,005 (86.5)                 | 4,442 (78.1)                           | 21,168 (85.3)                                                       | 2,279 (80.0)                                                                 |
| Number of serial troponin I measurements after the first elevated troponin I, median (IQR) | 2 (1, 3)                                     | 2 (1, 4)                      | 2 (1, 3)                               | 2 (1, 3)                                                            | 2 (1, 3)                                                                     |
| <b>Trend troponin I to peak, n (%)</b>                                                     | 18,255 (66.0)                                | 14,791 (67.3)                 | 3,464 (60.9)                           | 16,427 (66.2)                                                       | 1,828 (64.2)                                                                 |
| <b>Echocardiography, n (%)</b>                                                             | 18,455 (66.7)                                | 15,490 (70.5)                 | 2,965 (52.1)                           | 16,913 (68.2)                                                       | 1,542 (54.1)                                                                 |
| <b>Cardiac stress test, n (%)</b>                                                          | 1,128 (4.1)                                  | 961 (4.4)                     | 167 (2.9)                              | 1,053 (4.2)                                                         | 75 (2.6)                                                                     |
| <b>Cardiac catheterization, n (%)</b>                                                      | 1,829 (6.6)                                  | 1,756 (8.0)                   | 73 (1.3)                               | 1,786 (7.2)                                                         | 43 (1.5)                                                                     |
|                                                                                            |                                              |                               |                                        |                                                                     |                                                                              |
| <b>CARDIOVASCULAR THERAPEUTICS</b>                                                         |                                              |                               |                                        |                                                                     |                                                                              |
| <b>Antiplatelet agents, n (%)</b>                                                          | 13,349 (48.3)                                | 11,684 (53.2)                 | 1,665 (29.3)                           | 12,634 (50.9)                                                       | 715 (25.1)                                                                   |
| <b>Therapeutic anticoagulation, n (%)</b>                                                  | 2,293 (8.3)                                  | 2,077 (9.5)                   | 216 (3.8)                              | 2,168 (8.7)                                                         | 125 (4.4)                                                                    |
| <b>Beta-blockers, n (%)</b>                                                                | 13,967 (50.5)                                | 12,238 (55.7)                 | 1,729 (30.4)                           | 13,251 (53.4)                                                       | 716 (25.1)                                                                   |
| <b>Statins, n (%)</b>                                                                      | 10,541 (38.1)                                | 9,307 (42.4)                  | 1,234 (21.7)                           | 10,108 (40.7)                                                       | 433 (15.2)                                                                   |

<sup>a</sup>Abbreviations: IQR=Interquartile range

**e-Table 9: Multivariable adjusted odds of cardiovascular diagnostic testing among critically ill adults with sepsis and elevated troponin I**

| Characteristics                        | Cardiovascular Diagnostic Testing        |                                          |                                          |                                          |                                          |
|----------------------------------------|------------------------------------------|------------------------------------------|------------------------------------------|------------------------------------------|------------------------------------------|
|                                        | Serial Troponin I<br>OR (95% CI)         | Trend Troponin I to Peak<br>OR (95% CI)  | Echocardiography<br>OR (95% CI)          | Cardiac Stress Test<br>OR (95% CI)       | Cardiac Catheterization<br>OR (95% CI)   |
| <b>First Elevated Troponin I Level</b> | 0.95 (0.91, 0.98)<br>per 1 unit increase | 1.04 (1.01, 1.08)<br>per 1 unit increase | -                                        | -                                        | -                                        |
| <b>Maximum Troponin I Level</b>        | -                                        | -                                        | 1.22 (1.16, 1.28)<br>per 1 unit increase | 0.98 (0.92, 1.04)<br>per 1 unit increase | 1.32 (1.28, 1.36)<br>per 1 unit increase |
| <b>Admission Year</b>                  |                                          |                                          |                                          |                                          |                                          |
| 2016                                   | 1.00 (reference)                         |
| 2017                                   | 0.93 (0.81, 1.07)                        | 1.08 (0.97, 1.19)                        | 0.82 (0.73, 0.91)                        | 1.03 (0.82, 1.31)                        | 0.99 (0.80, 1.22)                        |
| 2018                                   | 0.97 (0.84, 1.11)                        | 1.03 (0.93, 1.14)                        | 0.85 (0.76, 0.95)                        | 1.07 (0.85, 1.35)                        | 0.99 (0.81, 1.22)                        |
| 2019                                   | 1.08 (0.94, 1.24)                        | 1.12 (1.01, 1.24)                        | 0.89 (0.80, 1.00)                        | 1.15 (0.91, 1.46)                        | 0.92 (0.75, 1.13)                        |
| 2020                                   | 1.05 (0.91, 1.23)                        | 1.10 (0.98, 1.23)                        | 0.79 (0.70, 0.89)                        | 1.03 (0.79, 1.35)                        | 0.78 (0.62, 0.98)                        |
| <b>PATIENT-LEVEL CHARACTERISTICS</b>   |                                          |                                          |                                          |                                          |                                          |
| <b>Age</b>                             | 0.97 (0.93, 1.01)<br>per 1 year increase | 0.93 (0.90, 0.96)<br>per 1 year increase | 0.88 (0.86, 0.91)<br>per 1 year increase | 0.85 (0.79, 0.91)<br>per 1 year increase | 0.76 (0.71, 0.80)<br>per 1 year increase |
| <b>Sex (Female)</b>                    | 1.00 (0.93, 1.07)                        | 1.09 (1.03, 1.15)                        | 0.97 (0.92, 1.02)                        | 0.99 (0.87, 1.12)                        | 0.94 (0.84, 1.04)                        |
| <b>Race</b>                            |                                          |                                          |                                          |                                          |                                          |
| White                                  | 1.00 (reference)                         |
| Black                                  | 1.06 (0.95, 1.18)                        | 0.95 (0.87, 1.03)                        | 0.95 (0.88, 1.04)                        | 1.25 (1.03, 1.53)                        | 0.70 (0.59, 0.84)                        |
| Other                                  | 0.98 (0.84, 1.16)                        | 0.96 (0.85, 1.09)                        | 0.90 (0.79, 1.02)                        | 1.74 (1.35, 2.25)                        | 1.11 (0.89, 1.39)                        |
| <b>Ethnicity (Hispanic)</b>            | 1.11 (0.94, 1.33)                        | 1.10 (0.97, 1.25)                        | 0.85 (0.74, 0.97)                        | 0.88 (0.65, 1.18)                        | 0.81 (0.62, 1.05)                        |
| <b>Comorbidities</b>                   |                                          |                                          |                                          |                                          |                                          |
| Myocardial Infarction                  | 5.33 (4.69, 6.06)                        | 1.94 (1.81, 2.08)                        | 2.79 (2.58, 3.01)                        | 2.23 (1.92, 2.58)                        | 4.92 (4.39, 5.51)                        |
| Congestive Heart Failure               | 1.19 (1.11, 1.29)                        | 1.04 (0.98, 1.10)                        | 1.44 (1.36, 1.53)                        | 1.24 (1.08, 1.43)                        | 2.44 (2.16, 2.76)                        |
| Cardiac Arrhythmia                     | 0.98 (0.91, 1.05)                        | 0.95 (0.90, 1.01)                        | 1.17 (1.10, 1.24)                        | 0.79 (0.69, 0.90)                        | 1.13 (1.01, 1.26)                        |
| Peripheral Vascular Disease            | 1.14 (1.01, 1.28)                        | 1.02 (0.93, 1.11)                        | 0.96 (0.87, 1.04)                        | 0.95 (0.77, 1.16)                        | 1.22 (1.04, 1.43)                        |
| Cerebrovascular Disease                | 1.17 (1.01, 1.35)                        | 1.03 (0.92, 1.14)                        | 1.63 (1.45, 1.84)                        | 1.08 (0.84, 1.38)                        | 0.68 (0.55, 0.84)                        |
| Pulmonary Circulation Disease          | 1.23 (1.11, 1.36)                        | 1.06 (0.98, 1.14)                        | 1.52 (1.40, 1.65)                        | 0.84 (0.71, 1.01)                        | 1.03 (0.90, 1.19)                        |
| Diabetes Mellitus                      | 1.01 (0.94, 1.08)                        | 0.92 (0.87, 0.98)                        | 0.91 (0.86, 0.96)                        | 1.06 (0.93, 1.21)                        | 1.13 (1.01, 1.26)                        |

|                                       |                                          |                                          |                                          |                                          |                                          |
|---------------------------------------|------------------------------------------|------------------------------------------|------------------------------------------|------------------------------------------|------------------------------------------|
| Chronic Kidney Disease                | 0.96 (0.89, 1.04)                        | 0.89 (0.84, 0.95)                        | 0.88 (0.83, 0.94)                        | 0.86 (0.74, 1.00)                        | 0.73 (0.64, 0.82)                        |
| Hypertension                          | 1.04 (0.94, 1.14)                        | 1.03 (0.96, 1.10)                        | 0.91 (0.85, 0.98)                        | 1.20 (1.01, 1.43)                        | 1.22 (1.05, 1.41)                        |
| Chronic Pulmonary Disease             | 1.03 (0.96, 1.11)                        | 1.13 (1.07, 1.20)                        | 0.87 (0.82, 0.92)                        | 0.94 (0.82, 1.07)                        | 0.89 (0.80, 0.99)                        |
| Liver Disease                         | 1.04 (0.94, 1.14)                        | 0.89 (0.83, 0.95)                        | 1.02 (0.95, 1.10)                        | 1.00 (0.83, 1.18)                        | 0.65 (0.55, 0.76)                        |
| <b>Organ Support Therapies</b>        |                                          |                                          |                                          |                                          |                                          |
| Vasopressors                          | 0.81 (0.75, 0.87)                        | 0.86 (0.81, 0.91)                        | 0.89 (0.84, 0.95)                        | 0.75 (0.65, 0.88)                        | 0.96 (0.85, 1.08)                        |
| Invasive Mechanical Ventilation       | 1.14 (1.06, 1.23)                        | 1.07 (1.01, 1.13)                        | 1.09 (1.03, 1.16)                        | 0.68 (0.59, 0.78)                        | 1.18 (1.05, 1.31)                        |
| Dialysis                              | 0.67 (0.59, 0.78)                        | 0.68 (0.61, 0.76)                        | 0.65 (0.58, 0.73)                        | 1.15 (0.89, 1.50)                        | 1.06 (0.83, 1.37)                        |
| <b>Maximum Admission SOFA Score</b>   | 1.03 (0.99, 1.08)<br>per 1 unit increase | 0.93 (0.90, 0.96)<br>per 1 unit increase | 1.14 (1.10, 1.18)<br>per 1 unit increase | 0.98 (0.91, 1.06)<br>per 1 unit increase | 0.85 (0.80, 0.90)<br>per 1 unit increase |
| <b>FACILITY-LEVEL CHARACTERISTICS</b> |                                          |                                          |                                          |                                          |                                          |
| <b>Hospital Community Type</b>        |                                          |                                          |                                          |                                          |                                          |
| Rural                                 | 1.00 (reference)                         |
| Urban                                 | 1.01 (0.63, 1.61)                        | 1.03 (0.70, 1.52)                        | 1.14 (0.87, 1.50)                        | 1.77 (0.81, 3.88)                        | 0.89 (0.52, 1.51)                        |
| <b>Teaching Status</b>                |                                          |                                          |                                          |                                          |                                          |
| Community Hospital                    | 1.00 (reference)                         |
| Academic Hospital                     | 1.24 (0.82, 1.88)                        | 1.35 (0.96, 1.91)                        | 0.68 (0.53, 0.86)                        | 0.96 (0.49, 1.87)                        | 0.84 (0.54, 1.32)                        |
| <b>Hospital Beds</b>                  |                                          |                                          |                                          |                                          |                                          |
| ≥ 500                                 | 1.00 (reference)                         |
| 200-499                               | 0.92 (0.55, 1.54)                        | 0.88 (0.57, 1.36)                        | 0.70 (0.52, 0.95)                        | 1.38 (0.61, 3.10)                        | 0.72 (0.42, 1.21)                        |
| < 200                                 | 1.29 (0.73, 2.28)                        | 1.18 (0.73, 1.90)                        | 0.76 (0.54, 1.06)                        | 1.00 (0.40, 2.51)                        | 0.29 (0.16, 0.55)                        |
| <b>Geographic Region</b>              |                                          |                                          |                                          |                                          |                                          |
| South                                 | 1.00 (reference)                         |
| Northeast                             | 1.01 (0.55, 1.86)                        | 1.52 (0.91, 2.53)                        | 1.39 (0.98, 1.99)                        | 1.66 (0.64, 4.30)                        | 0.99 (0.52, 1.88)                        |
| Midwest                               | 1.39 (0.95, 2.02)                        | 1.66 (1.21, 2.27)                        | 1.14 (0.92, 1.43)                        | 2.13 (1.16, 3.89)                        | 0.63 (0.41, 0.96)                        |
| West                                  | 1.30 (0.21, 8.03)                        | 1.69 (0.37, 7.65)                        | 1.22 (0.42, 3.56)                        | < 0.01 (<0.001, >100)                    | 1.05 (0.15, 7.18)                        |

<sup>a</sup>Abbreviations: OR = Odds ratio; CI = Confidence interval; SOFA = Sequential organ failure assessment

<sup>b</sup>Covariates:

**Patient-level factors** such as age, sex, race, ethnicity; history of myocardial infarction, congestive heart failure, cardiac arrhythmia, peripheral vascular disease, cerebrovascular disease, pulmonary circulation disease, diabetes mellitus, chronic kidney disease, hypertension, chronic pulmonary disease, liver disease; admission year, organ support therapies received, maximum admission sequential organ failure assessment score, and either first elevated troponin I level or maximum troponin I level.

**Facility-level factors** such as hospital community type, hospital teaching status, hospital beds, and hospital geographic region.

**e-Table 10: Multivariable adjusted odds of cardiovascular therapeutics among critically ill adults with sepsis and elevated troponin I**

| Characteristics                        | Cardiovascular Therapeutics              |                                            |                                          |                                          |
|----------------------------------------|------------------------------------------|--------------------------------------------|------------------------------------------|------------------------------------------|
|                                        | Antiplatelet Agents<br>OR (95% CI)       | Therapeutic Anticoagulation<br>OR (95% CI) | Beta-Blockers<br>OR (95% CI)             | Statins<br>OR (95% CI)                   |
| <b>First Elevated Troponin I Level</b> | -                                        | -                                          | -                                        | -                                        |
| <b>Maximum Troponin I Level</b>        | 1.32 (1.27, 1.37)<br>per 1 unit increase | 1.36 (1.31, 1.42)<br>per 1 unit increase   | 1.10 (1.07, 1.13)<br>per 1 unit increase | 1.16 (1.12, 1.19)<br>per 1 unit increase |
| <b>Admission Year</b>                  |                                          |                                            |                                          |                                          |
| 2016                                   | 1.00 (reference)                         | 1.00 (reference)                           | 1.00 (reference)                         | 1.00 (reference)                         |
| 2017                                   | 0.92 (0.83, 1.02)                        | 0.78 (0.62, 0.99)                          | 1.06 (0.96, 1.18)                        | 0.99 (0.89, 1.10)                        |
| 2018                                   | 0.88 (0.79, 0.97)                        | 0.70 (0.56, 0.89)                          | 1.04 (0.94, 1.15)                        | 1.03 (0.93, 1.15)                        |
| 2019                                   | 0.78 (0.71, 0.86)                        | 0.72 (0.57, 0.91)                          | 0.98 (0.89, 1.09)                        | 1.06 (0.95, 1.18)                        |
| 2020                                   | 0.71 (0.63, 0.79)                        | 0.71 (0.56, 0.91)                          | 0.89 (0.80, 0.99)                        | 1.06 (0.94, 1.19)                        |
| <b>PATIENT-LEVEL CHARACTERISTICS</b>   |                                          |                                            |                                          |                                          |
| <b>Age</b>                             | 1.13 (1.10, 1.17)<br>per 1 year increase | 0.93 (0.88, 0.99)<br>per 1 year increase   | 0.98 (0.95, 1.01)<br>per 1 year increase | 1.18 (1.15, 1.22)<br>per 1 year increase |
| <b>Sex (Female)</b>                    | 0.87 (0.83, 0.92)                        | 0.93 (0.84, 1.03)                          | 0.97 (0.92, 1.02)                        | 0.87 (0.82, 0.92)                        |
| <b>Race</b>                            |                                          |                                            |                                          |                                          |
| White                                  | 1.00 (reference)                         | 1.00 (reference)                           | 1.00 (reference)                         | 1.00 (reference)                         |
| Black                                  | 0.95 (0.87, 1.03)                        | 1.07 (0.90, 1.26)                          | 1.04 (0.96, 1.12)                        | 0.93 (0.85, 1.01)                        |
| Other                                  | 0.85 (0.75, 0.96)                        | 1.07 (0.86, 1.33)                          | 0.93 (0.83, 1.05)                        | 1.01 (0.89, 1.14)                        |
| <b>Ethnicity (Hispanic)</b>            | 0.93 (0.82, 1.06)                        | 0.99 (0.69, 1.44)                          | 0.85 (0.75, 0.97)                        | 0.85 (0.74, 0.98)                        |
| <b>Comorbidities</b>                   |                                          |                                            |                                          |                                          |
| Myocardial Infarction                  | 2.87 (2.69, 3.07)                        | 3.12 (2.79, 3.48)                          | 1.83 (1.71, 1.95)                        | 2.21 (2.07, 2.36)                        |
| Congestive Heart Failure               | 1.74 (1.65, 1.84)                        | 1.23 (1.10, 1.37)                          | 1.90 (1.80, 2.01)                        | 1.57 (1.48, 1.66)                        |
| Cardiac Arrhythmia                     | 0.93 (0.88, 0.98)                        | 1.12 (1.01, 1.25)                          | 1.55 (1.47, 1.63)                        | 0.96 (0.91, 1.01)                        |
| Peripheral Vascular Disease            | 1.14 (1.05, 1.24)                        | 1.10 (0.94, 1.29)                          | 1.14 (1.05, 1.24)                        | 1.30 (1.20, 1.42)                        |
| Cerebrovascular Disease                | 1.47 (1.32, 1.63)                        | 0.79 (0.64, 0.97)                          | 1.26 (1.14, 1.40)                        | 1.77 (1.60, 1.97)                        |
| Pulmonary Circulation Disease          | 0.98 (0.91, 1.05)                        | 1.99 (1.74, 2.27)                          | 0.83 (0.77, 0.89)                        | 0.97 (0.90, 1.04)                        |
| Diabetes Mellitus                      | 1.37 (1.30, 1.44)                        | 1.06 (0.95, 1.18)                          | 1.12 (1.06, 1.18)                        | 1.71 (1.62, 1.81)                        |
| Chronic Kidney Disease                 | 1.07 (1.01, 1.13)                        | 0.83 (0.74, 0.93)                          | 0.99 (0.94, 1.05)                        | 1.17 (1.10, 1.24)                        |
| Hypertension                           | 1.31 (1.22, 1.41)                        | 1.14 (0.99, 1.30)                          | 1.80 (1.68, 1.93)                        | 1.59 (1.47, 1.71)                        |

|                                       |                                          |                                          |                                          |                                          |
|---------------------------------------|------------------------------------------|------------------------------------------|------------------------------------------|------------------------------------------|
| Chronic Pulmonary Disease             | 1.16 (1.10, 1.23)                        | 0.92 (0.83, 1.03)                        | 1.00 (0.95, 1.06)                        | 1.18 (1.12, 1.25)                        |
| Liver Disease                         | 0.65 (0.61, 0.70)                        | 0.67 (0.58, 0.78)                        | 0.77 (0.72, 0.83)                        | 0.44 (0.41, 0.48)                        |
| <b>Organ Support Therapies</b>        |                                          |                                          |                                          |                                          |
| Vasopressors                          | 0.79 (0.74, 0.84)                        | 0.99 (0.89, 1.11)                        | 0.53 (0.50, 0.57)                        | 0.79 (0.74, 0.84)                        |
| Invasive Mechanical Ventilation       | 0.79 (0.75, 0.84)                        | 1.17 (1.06, 1.31)                        | 1.01 (0.96, 1.07)                        | 0.80 (0.76, 0.85)                        |
| Dialysis                              | 0.80 (0.71, 0.90)                        | 0.89 (0.70, 1.13)                        | 0.79 (0.71, 0.89)                        | 0.79 (0.70, 0.90)                        |
| <b>Maximum Admission SOFA Score</b>   | 0.91 (0.88, 0.94)<br>per 1 unit increase | 0.95 (0.89, 1.01)<br>per 1 unit increase | 0.94 (0.92, 0.97)<br>per 1 unit increase | 0.88 (0.85, 0.91)<br>per 1 unit increase |
| <b>FACILITY-LEVEL CHARACTERISTICS</b> |                                          |                                          |                                          |                                          |
| <b>Hospital Community Type</b>        |                                          |                                          |                                          |                                          |
| Rural                                 | 1.00 (reference)                         | 1.00 (reference)                         | 1.00 (reference)                         | 1.00 (reference)                         |
| Urban                                 | 0.94 (0.79, 1.12)                        | 1.28 (0.37, 4.43)                        | 0.85 (0.70, 1.04)                        | 1.07 (0.88, 1.31)                        |
| <b>Teaching Status</b>                |                                          |                                          |                                          |                                          |
| Community Hospital                    | 1.00 (reference)                         | 1.00 (reference)                         | 1.00 (reference)                         | 1.00 (reference)                         |
| Academic Hospital                     | 0.96 (0.83, 1.11)                        | 1.61 (0.54, 4.86)                        | 1.04 (0.88, 1.24)                        | 1.13 (0.95, 1.35)                        |
| <b>Hospital Beds</b>                  |                                          |                                          |                                          |                                          |
| ≥ 500                                 | 1.00 (reference)                         | 1.00 (reference)                         | 1.00 (reference)                         | 1.00 (reference)                         |
| 200-499                               | 1.08 (0.91, 1.28)                        | 3.99 (0.96, 16.66)                       | 1.07 (0.87, 1.32)                        | 1.05 (0.85, 1.29)                        |
| < 200                                 | 1.26 (1.04, 1.53)                        | 2.79 (0.59, 13.20)                       | 1.08 (0.85, 1.36)                        | 1.14 (0.90, 1.45)                        |
| <b>Geographic Region</b>              |                                          |                                          |                                          |                                          |
| South                                 | 1.00 (reference)                         | 1.00 (reference)                         | 1.00 (reference)                         | 1.00 (reference)                         |
| Northeast                             | 1.01 (0.81, 1.25)                        | 0.01 (<0.01, 0.11)                       | 0.97 (0.75, 1.25)                        | 1.17 (0.90, 1.51)                        |
| Midwest                               | 1.01 (0.88, 1.15)                        | 0.43 (0.15, 1.18)                        | 0.95 (0.81, 1.11)                        | 1.17 (1.00, 1.38)                        |
| West                                  | 0.75 (0.37, 1.53)                        | < 0.01 (<0.001, >100)                    | 0.73 (0.33, 1.65)                        | 0.70 (0.31, 1.61)                        |

<sup>a</sup>Abbreviations: OR = Odds ratio; CI = Confidence interval; SOFA = Sequential organ failure assessment

<sup>b</sup>Covariates:

**Patient-level factors** such as age, sex, race, ethnicity; history of myocardial infarction, congestive heart failure, cardiac arrhythmia, peripheral vascular disease, cerebrovascular disease, pulmonary circulation disease, diabetes mellitus, chronic kidney disease, hypertension, chronic pulmonary disease, liver disease; admission year, organ support therapies received, maximum admission sequential organ failure assessment score, and maximum troponin I level.

**Facility-level factors** such as hospital community type, hospital teaching status, hospital beds, and hospital geographic region.
